# Supplementary material
Source: PubMed Central journal article supplement (PMC8774746)
Supplement: kiab475_supplementary_information.pdf [file kiab475_supplementary_information.pdf]

**A**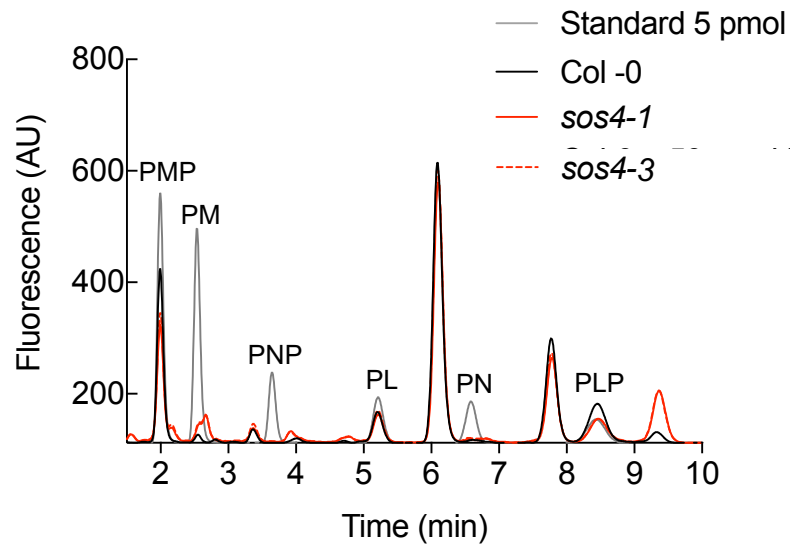**B**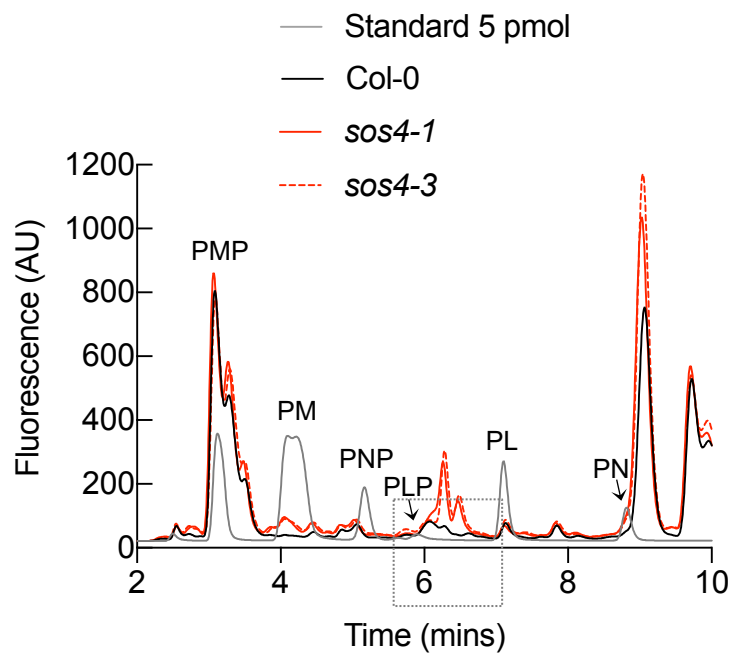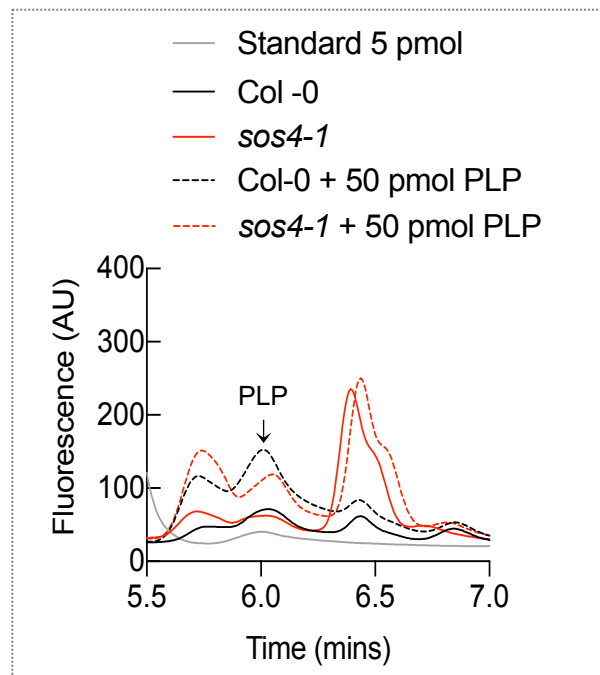

**Supplemental Figure S1.** Comparison of HPLC methods for assessment of B<sub>6</sub> vitamers.

**(A)** A representative HPLC chromatogram of B<sub>6</sub> vitamers with the method established in our study. The individual vitamer standards are pyridoxal 5'-phosphate (PLP), pyridoxamine 5'-phosphate (PMP), pyridoxine 5'-phosphate (PNP), pyridoxal (PL), pyridoxamine (PM), pyridoxine (PN). In each case 5 pmol was loaded. In the case of the plant extracts, the material used from each line was shoots (25 mg) of 3-week-old plants grown on soil in individual pots in 16 hr light (120  $\mu\text{mol photons m}^{-2} \text{s}^{-1}$  at 21°C), 8 hr dark (at 18°C) cycles. The key indicates the color coding used for each line.

**(B)** A representative HPLC chromatogram of B<sub>6</sub> vitamers employing the method described in González E et al 2007 Plant Physiol. The individual vitamer standards are as in **(A)**. To aid visualization of the profile around PLP (hashed frame on the left chromatogram), the area from retention time 5.5 to 7 min is shown on the right on a smaller scale. The plant extracts used from each line was lyophilized shoots (25 mg) of 36-day-old plants grown on soil in individual pots 8 hr light (120  $\mu\text{mol photons m}^{-2} \text{s}^{-1}$  at 21°C), 16 hr dark (at 18°C) cycles. The key indicates the color coding used for each line. Plant extracts that were spiked with 50 pmol PLP are also shown.

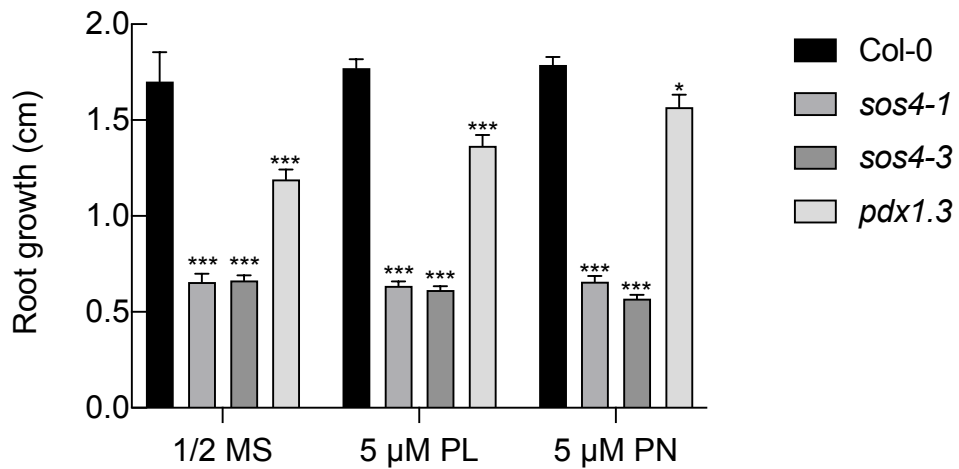

**Supplemental Fig. S2.** Effect of external application of PN or PL on *sos4* root growth.

Elongation of roots of 5-day-old seedlings of *sos4* alleles or the biosynthesis *de novo* mutant *pdx1.3* compared to wild type (Col-0) grown in sterile culture medium (1/2 MS) in the absence or presence of either PN or PL (5  $\mu$ M in each case). The data represent the mean  $\pm$  SD of three biological replicates (each comprising  $\geq$  8 plants). The asterisks indicate significance by one-way ANOVA tests (\* P value < 0.05, \*\*\* P value < 0.001). A separate ANOVA was used for each line in comparison with the wild type.

**A**

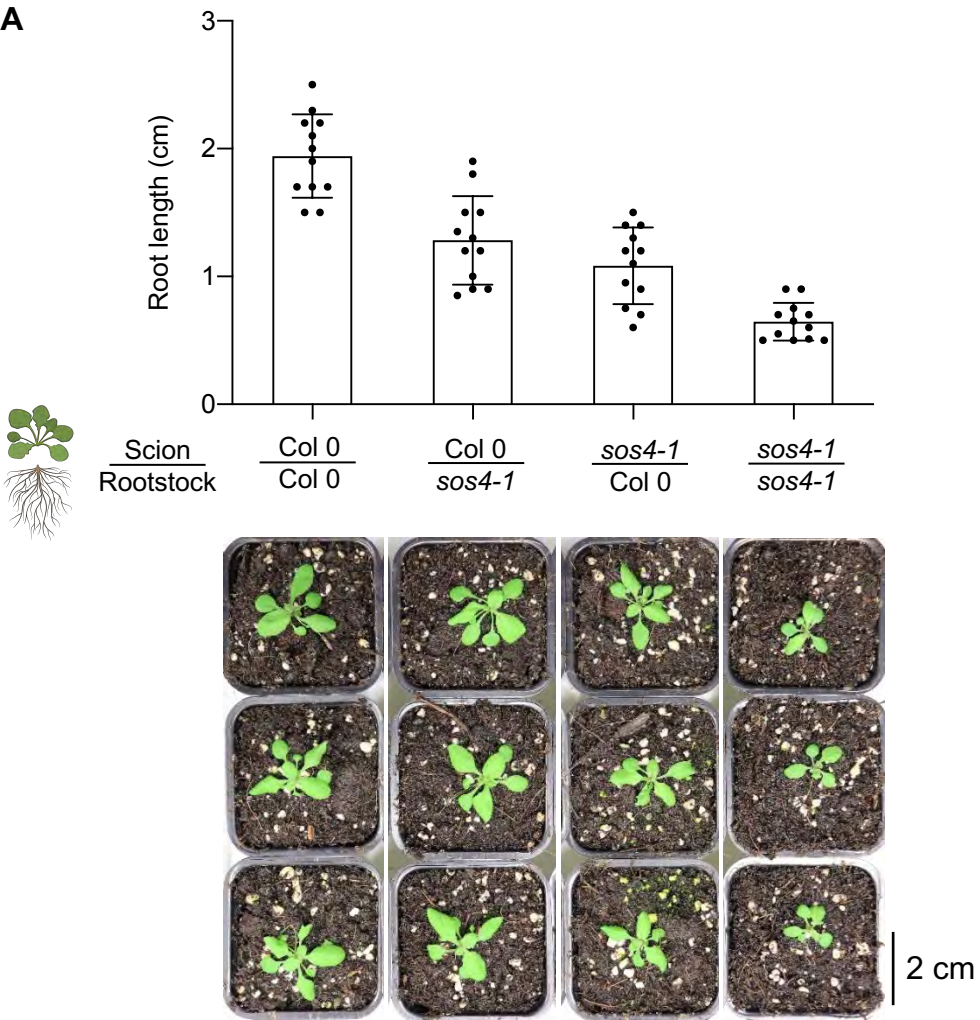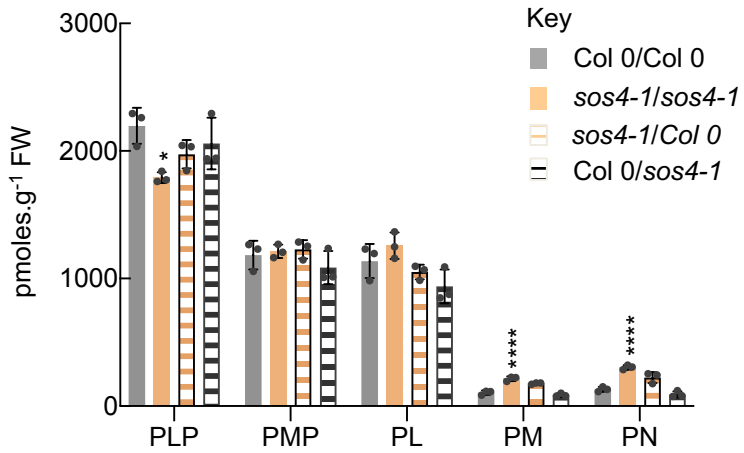

**B**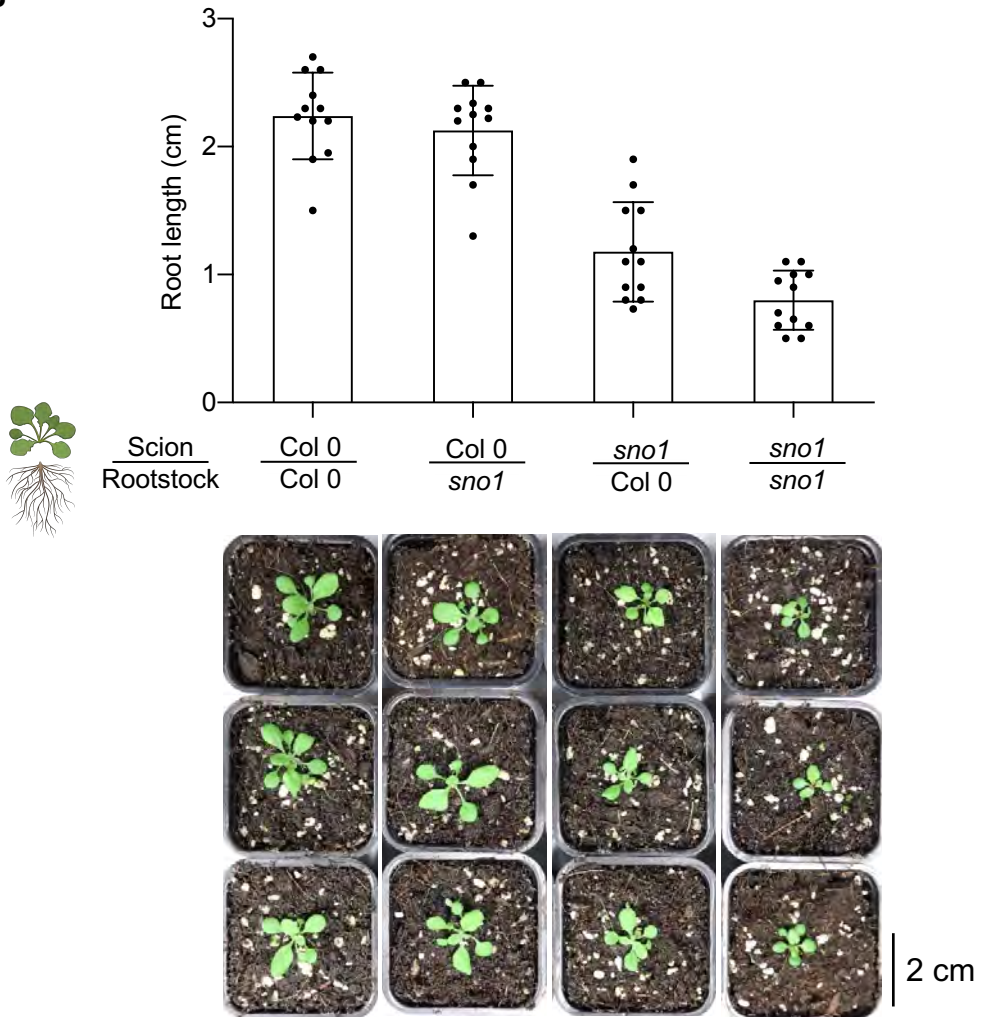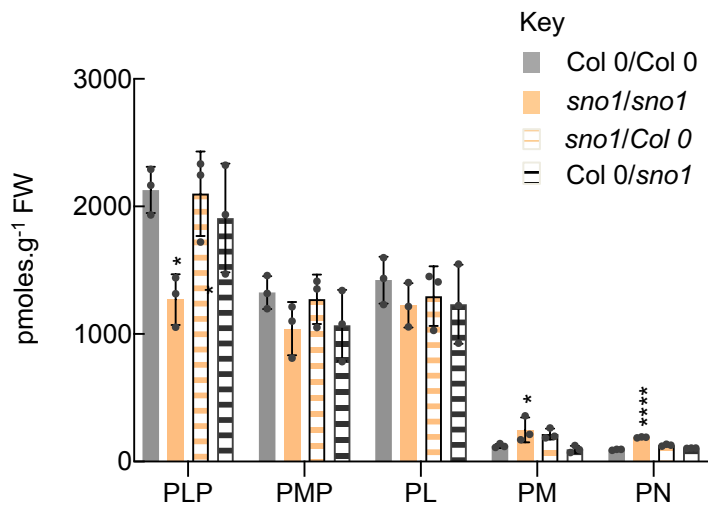

**Supplemental Figure S3.** Reciprocal micrografting of *sos4* lines and wild type.

**(A)** and **(B)** The histogram at the top shows the elongation of micrografted roots at 7 days after grafting. The data are the mean  $\pm$  SD of three biological replicates (each comprising  $\geq 12$ ). The scion and rootstock used are as indicated below. Below this are photographs of micrografted seedlings initially grown on sterile culture medium for 7 days and then transferred to soil for 14 days, in each case under 16 hr light ( $120 \mu\text{mol photons m}^{-2} \text{s}^{-1}$  at  $21^\circ\text{C}$ ), 8 hr dark (at  $18^\circ\text{C}$ ) cycles. The scion and rootstock used are as indicated above. The histogram at the bottom shows the individual B<sub>6</sub> vitamer content in the shoots of plants grown as shown in the photographs. The individual vitamers are pyridoxal 5'-phosphate (PLP), pyridoxamine 5'-phosphate (PMP), pyridoxal (PL), pyridoxamine (PM), pyridoxine (PN). The key indicates the color coding used for each micrografted line.

The data are represented as the mean  $\pm$  SD of three biological replicates (each comprising  $\geq 15$  plants grown in individual pots). Asterisks indicate significance by one-way ANOVA test (\* P value  $< 0.05$ , \*\* P value  $< 0.01$ , \*\*\* P value  $< 0.001$ ). A separate ANOVA was used for each line in comparison with the wild type.

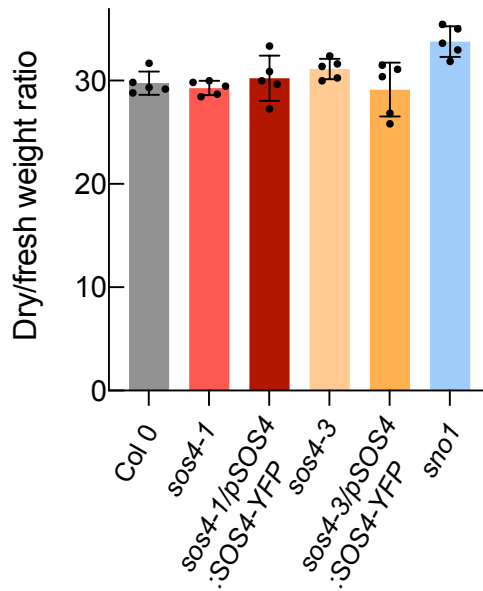

**Supplemental Figure S4.** Determination of the dry-to-fresh mass ratio of genotypes.

Seedlings were grown on sterile culture under 16 hr light ( $120 \mu\text{mol photons m}^{-2} \text{s}^{-1}$  at  $21^\circ\text{C}$ ), 8 hr dark (at  $18^\circ\text{C}$ ) cycles for 2 weeks after which dry and fresh weight of shoots was determined. The data are mean dry to fresh weight ratios  $\pm$  SD of five biological replicates (each comprising shoots of 5 seedlings).

**Supplemental Table S1.** Elemental content of lines relative to wild type.

Inome profile of shoots and roots of 2-week-old plants grown on soil in 16 hr light (either 120 or 20  $\mu\text{mol photons m}^{-2} \text{s}^{-1}$  at 21 °C), 8 hr dark (at 18 °C) cycles. Elements were determined by ICP-MS. The data are the mean log values  $\pm$  SD of three biological replicates (each comprising  $\geq$  20 plants). Significance was determined by one-way ANOVA tests for  $p$  value  $<$  0.01.

Roots 20  $\mu\text{mol photons m}^{-2} \text{s}^{-1}$

| Element | <i>sos4-1</i> vs wild type |      |         | <i>sos4-3</i> vs wild type |      |         | <i>sno1</i> vs wild type |       |         |
|---------|----------------------------|------|---------|----------------------------|------|---------|--------------------------|-------|---------|
|         | mean                       | SD   | P value | mean                       | SD   | P value | mean                     | SD    | P value |
| Li 7    | -1,15                      | 0,07 | <0,0001 | -0,56                      | 0,27 | 0,0042  | -0,07                    | 0,09  | 0,8904  |
| B 11    | 0,78                       | 0,39 | 0,0137  | -0,01                      | 0,31 | 0,9996  | -0,22                    | 0,055 | 0,6079  |
| Na 23   | -0,33                      | 0,15 | 0,0062  | -0,42                      | 0,09 | 0,0015  | -0,29                    | 0,04  | 0,0125  |
| Mg 24   | -0,38                      | 0,14 | 0,0019  | -0,32                      | 0,08 | 0,0047  | 0,03                     | 0,078 | 0,9272  |
| P 31    | -0,00                      | 0,12 | >0,9999 | -0,19                      | 0,00 | 0,012   | -0,15                    | 0,03  | 0,0386  |
| S 34    | -0,01                      | 0,17 | 0,9955  | -0,25                      | 0,03 | 0,0193  | -0,18                    | 0,04  | 0,092   |
| K 39    | -0,30                      | 0,07 | 0,0015  | -0,14                      | 0,08 | 0,0717  | -0,05                    | 0,07  | 0,6312  |
| Ca 43   | -0,32                      | 0,37 | 0,1902  | -0,55                      | 0,09 | 0,0241  | -0,29                    | 0,10  | 0,2387  |
| Mn 55   | 0,56                       | 0,04 | 0,0002  | 0,69                       | 0,03 | <0,0001 | 0,61                     | 0,17  | <0,0001 |
| Fe 56   | 0,02                       | 0,07 | 0,9155  | -0,08                      | 0,07 | 0,2562  | -0,14                    | 0,06  | 0,0501  |
| Co 59   | 0,60                       | 0,10 | <0,0001 | 0,58                       | 0,09 | <0,0001 | 0,40                     | 0,09  | 0,0008  |
| Ni 60   | 0,56                       | 0,06 | <0,0001 | 0,46                       | 0,02 | <0,0001 | 0,49                     | 0,08  | <0,0001 |
| Cu 63   | -0,13                      | 0,16 | 0,4373  | -0,25                      | 0,06 | 0,071   | -0,28                    | 0,16  | 0,0454  |
| Zn 66   | 0,20                       | 0,16 | 0,1436  | 0,13                       | 0,15 | 0,4287  | -0,18                    | 0,08  | 0,2039  |
| Mo 98   | 0,14                       | 0,19 | 0,5609  | 0,35                       | 0,13 | 0,0547  | 0,44                     | 0,19  | 0,0192  |

Shoots 20  $\mu\text{mol photons m}^{-2} \text{s}^{-1}$

| Element | <i>sos4-1</i> vs wild type |      |         | <i>sos4-3</i> vs wild type |      |         | <i>sno1</i> vs wild type |      |         |
|---------|----------------------------|------|---------|----------------------------|------|---------|--------------------------|------|---------|
|         | mean                       | SD   | P value | mean                       | SD   | P value | mean                     | SD   | P value |
| Li 7    | -0,36                      | 0,03 | <0,0001 | -0,22                      | 0,19 | 0,0027  | -0,03                    | 0,08 | 0,8599  |
| B 11    | -0,16                      | 0,13 | 0,1309  | 0,00                       | 0,20 | >0,9999 | -0,30                    | 0,12 | 0,0031  |
| Na 23   | -0,19                      | 0,04 | 0,0093  | -0,10                      | 0,18 | 0,2358  | 0,01                     | 0,08 | 0,9883  |
| Mg 24   | -0,17                      | 0,04 | 0,0128  | -0,17                      | 0,15 | 0,0135  | 0,02                     | 0,09 | 0,9628  |
| P 31    | 0,24                       | 0,03 | 0,0006  | 0,10                       | 0,17 | 0,1481  | -0,10                    | 0,06 | 0,149   |
| S 34    | -0,23                      | 0,07 | <0,0001 | -0,29                      | 0,09 | <0,0001 | 0,02                     | 0,07 | 0,8716  |
| K 39    | 0,26                       | 0,07 | 0,001   | 0,06                       | 0,19 | 0,6577  | 0,07                     | 0,05 | 0,5614  |
| Ca 43   | 0,17                       | 0,03 | <0,0001 | 0,15                       | 0,03 | <0,0001 | 0,15                     | 0,03 | <0,0001 |
| Mn 55   | 0,21                       | 0,16 | 0,345   | 0,36                       | 0,36 | 0,053   | 0,11                     | 0,29 | 0,7812  |
| Fe 56   | 0,09                       | 0,17 | 0,3852  | 0,17                       | 0,17 | 0,0696  | -0,13                    | 0,06 | 0,1876  |
| Co 59   | 0,23                       | 0,19 | 0,1901  | 0,14                       | 0,27 | 0,5732  | 0,17                     | 0,29 | 0,3992  |
| Ni 60   | -0,16                      | 0,11 | 0,282   | -0,12                      | 0,27 | 0,4899  | 0,23                     | 0,21 | 0,0864  |
| Cu 63   | 0,30                       | 1,00 | 0,6145  | 0,03                       | 0,10 | 0,9994  | 0,01                     | 0,07 | >0,9999 |
| Zn 66   | -0,17                      | 0,07 | 0,7059  | -0,14                      | 0,13 | 0,8022  | 0,13                     | 0,64 | 0,8381  |
| Mo 98   | -0,32                      | 0,04 | <0,0001 | -0,65                      | 0,11 | <0,0001 | -0,14                    | 0,14 | 0,0434  |

Roots 120  $\mu\text{mol photons m}^{-2} \text{s}^{-1}$

| Element | <i>sos4-1</i> vs wild type |      |         | <i>sos4-1/pSOS4:SOS4-YFP</i> vs wild type |      |         | <i>sos4-3</i> vs wild type |      |         | <i>sno1</i> vs wild type |      |         |
|---------|----------------------------|------|---------|-------------------------------------------|------|---------|----------------------------|------|---------|--------------------------|------|---------|
|         | mean                       | SD   | P value | mean                                      | SD   | P value | mean                       | SD   | P value | mean                     | SD   | P value |
| Li 7    | -0,10                      | 0,19 | 0,9156  | 0,11                                      | 0,53 | 0,8666  | 0,15                       | 0,18 | 0,7375  | 0,03                     | 0,17 | 0,998   |
| B 11    | 0,28                       | 0,09 | 0,0828  | 0,10                                      | 0,22 | 0,7888  | 0,09                       | 0,14 | 0,8583  | 0,36                     | 0,36 | 0,0166  |
| Na 23   | -1,17                      | 0,17 | <0,0001 | 0,24                                      | 0,35 | 0,2108  | -1,20                      | 0,15 | <0,0001 | -0,77                    | 0,27 | <0,0001 |
| Mg 24   | -0,72                      | 0,19 | <0,0001 | -0,06                                     | 0,28 | 0,9295  | -0,49                      | 0,15 | 0,0003  | -0,69                    | 0,16 | <0,0001 |
| P 31    | -0,39                      | 0,08 | <0,0001 | 0,02                                      | 0,07 | 0,9883  | -0,29                      | 0,09 | <0,0001 | -0,29                    | 0,11 | <0,0001 |
| S 34    | 0,02                       | 0,04 | 0,9073  | 0,03                                      | 0,05 | 0,87    | 0,10                       | 0,11 | 0,04    | 0,09                     | 0,07 | 0,0856  |
| K 39    | -0,07                      | 0,06 | 0,5098  | 1,97E-04                                  | 0,13 | >0,9999 | -0,08                      | 0,03 | 0,3129  | -0,04                    | 0,13 | 0,8709  |
| Ca 43   | -0,32                      | 0,05 | <0,0001 | -0,08                                     | 0,14 | 0,3631  | -0,13                      | 0,13 | 0,065   | -0,36                    | 0,06 | <0,0001 |
| Mn 55   | 1,45                       | 0,39 | 0,0001  | 0,17                                      | 0,41 | 0,9292  | 1,05                       | 0,36 | 0,0038  | 1,82                     | 0,87 | <0,0001 |
| Fe 56   | 0,16                       | 0,15 | 0,3703  | -0,08                                     | 0,15 | 0,6555  | 0,03                       | 0,11 | 0,9771  | 0,17                     | 0,16 | 0,0993  |
| Co 59   | 1,27                       | 0,39 | 0,0002  | 0,11                                      | 0,34 | 0,9767  | 0,94                       | 0,31 | 0,0042  | 1,58                     | 0,79 | <0,0001 |
| Ni 60   | 1,53                       | 0,33 | <0,0001 | 0,03                                      | 0,31 | 0,9998  | 1,23                       | 0,31 | 0,0001  | 1,79                     | 0,76 | <0,0001 |
| Cu 63   | 0,51                       | 0,19 | <0,0001 | 0,07                                      | 0,09 | 0,7286  | 0,36                       | 0,09 | 0,0002  | 0,36                     | 0,16 | 0,0002  |
| Zn 66   | 0,59                       | 0,31 | 0,0446  | 0,06                                      | 0,21 | 0,995   | 0,27                       | 0,25 | 0,5647  | 0,83                     | 0,73 | 0,0034  |
| Mo 98   | 0,59                       | 0,35 | 0,0028  | 0,29                                      | 0,43 | 0,195   | 0,15                       | 0,16 | 0,752   | 0,62                     | 0,16 | 0,0018  |



Shoots 120  $\mu\text{mol photons m}^{-2} \text{ s}^{-1}$

| Element | <i>sos4-1</i> vs wild type |       |         | <i>sos4-1/pSOS4:SOS4-YFP</i><br>vs wild type |      |         | <i>sos4-3</i> vs wild type |      |         | <i>sno1</i> vs wild type |      |         |
|---------|----------------------------|-------|---------|----------------------------------------------|------|---------|----------------------------|------|---------|--------------------------|------|---------|
|         | mean                       | SD    | P value | mean                                         | SD   | P value | mean                       | SD   | P value | mean                     | SD   | P value |
| Li 7    | -0,37                      | 0,07  | <0,0001 | -0,03                                        | 0,04 | 0,7819  | -0,03                      | 0,09 | 0,8084  | 0,13                     | 0,06 | 0,0046  |
| B 11    | 0,28                       | 0,09  | <0,0001 | -0,10                                        | 0,05 | 0,0263  | 0,3                        | 0,05 | <0,0001 | 0,34                     | 0,08 | <0,0001 |
| Na 23   | -0,40                      | 0,36  | 0,0175  | -0,13                                        | 0,26 | 0,724   | 0,41                       | 0,18 | 0,0139  | 0,91                     | 0,17 | <0,0001 |
| Mg 24   | -0,28                      | 0,056 | <0,0001 | -0,05                                        | 0,06 | 0,5203  | -0,01                      | 0,08 | 0,998   | 0,15                     | 0,08 | 0,0013  |
| P 31    | -0,83                      | 0,17  | <0,0001 | 0,00                                         | 0,07 | 0,9998  | -1,10                      | 0,08 | <0,0001 | -1,00                    | 0,06 | <0,0001 |
| S 34    | -0,39                      | 0,10  | <0,0001 | -0,02                                        | 0,05 | 0,951   | -0,21                      | 0,04 | 0,0001  | -0,33                    | 0,09 | <0,0001 |
| K 39    | -0,13                      | 0,03  | 0,0004  | 0,07                                         | 0,04 | 0,0713  | -0,08                      | 0,05 | 0,0498  | -0,31                    | 0,08 | <0,0001 |
| Ca 43   | -0,23                      | 0,05  | <0,0001 | 0,03                                         | 0,04 | 0,6207  | -0,30                      | 0,08 | <0,0001 | -0,20                    | 0,03 | <0,0001 |
| Mn 55   | 0,26                       | 0,08  | <0,0001 | -0,02                                        | 0,04 | 0,9728  | 0,12                       | 0,12 | 0,0373  | 0,34                     | 0,08 | <0,0001 |
| Fe 56   | 0,49                       | 0,07  | <0,0001 | -0,05                                        | 0,02 | 0,4271  | 0,33                       | 0,08 | <0,0001 | 0,26                     | 0,08 | <0,0001 |
| Co 59   | 0,87                       | 0,17  | <0,0001 | -0,18                                        | 0,07 | 0,0372  | 0,57                       | 0,14 | <0,0001 | 0,68                     | 0,09 | <0,0001 |
| Ni 60   | 0,37                       | 0,09  | <0,0001 | 0,02                                         | 0,12 | 0,9829  | 0,29                       | 0,11 | 0,0003  | 0,36                     | 0,16 | <0,0001 |
| Cu 63   | 0,10                       | 0,10  | 0,0691  | 0,06                                         | 0,09 | 0,3931  | 0,14                       | 0,09 | 0,0139  | -0,24                    | 0,04 | <0,0001 |
| Zn 66   | 0,05                       | 0,09  | 0,5801  | -0,08                                        | 0,03 | 0,1486  | -0,49                      | 0,06 | <0,0001 | -0,29                    | 0,10 | <0,0001 |
| Mo 98   | -0,77                      | 0,14  | <0,0001 | 0,08                                         | 0,17 | 0,6001  | -0,77                      | 0,16 | <0,0001 | -0,82                    | 0,08 | <0,0001 |

**Supplemental Table S2.** Oligonucleotide primers used in this study

| Purpose    | Gene         | AGI number | Sequence                            | Notes |                                  |
|------------|--------------|------------|-------------------------------------|-------|----------------------------------|
| Cloning    | <i>SOS4</i>  | At5g37850  | F- CACCATGACGACGCCTCCAG             |       |                                  |
|            |              |            | R- GCTGTATCTTTCAGCTTTCAGTTCGACC     |       |                                  |
|            | <i>pSOS4</i> | At5g37850  | F- CCGAGCTCTCAAGCTTTTTGATTAGTGTGTGA |       | -1973 to <i>SOS4</i> start codon |
|            |              |            | R- GGACTAGTAGCTTCTGTTTGACCCATGAGAC  |       |                                  |
| qPCR       | <i>SOS4</i>  | At5g37850  | F- ACGTTGCAGGCGCTTTTGCG             |       |                                  |
|            |              |            | R- AGTTCGACCTTCGGGTTGCGA            |       |                                  |
|            | <i>UBC21</i> | At5g25760  | F- TAGCATTGATGGCTCATCCTGA           |       | Reference gene                   |
|            |              |            | R- TTGTGCCATTGAATTGAACCC            |       |                                  |
| Genotyping | <i>SOS4</i>  | At5g37850  | F- TGGAAACTGTGAACACCGGATAT          |       |                                  |
|            |              |            | R- CCAAACCAAACAGTCTAAGGCTG          |       |                                  |
|            |              |            | ATATTGACCATCATACTCATTGC             |       | Left border T-DNA                |
